# Supplementary material for: Aquacobalamin Accelerates Orange II Destruction by Peroxymonosulfate via the Transient Formation of Secocorrinoid: A Mechanistic Study
Source: MDPI journal article supplement (doi:10.3390/ijms231911907), 2022-10-07
Supplement: s1 [file s1]

## **Supplementary Material**

### **Aquacobalamin accelerates Orange II destruction by peroxymonosulfate via the transient formation of secocorrinoid: a mechanistic study**

Ilia A. Dereven'kov, Ekaterina S. Sakharova, Vladimir S. Osokin, and Sergei V. Makarov\*

Department of Food Chemistry, Ivanovo State University of Chemistry and Technology,  
Sheremetevskiy str. 7, 153000 Ivanovo, Russia

\* Author to whom correspondence should be addressed.

E-mail address: makarov@isuct.ru (S.V. Makarov)

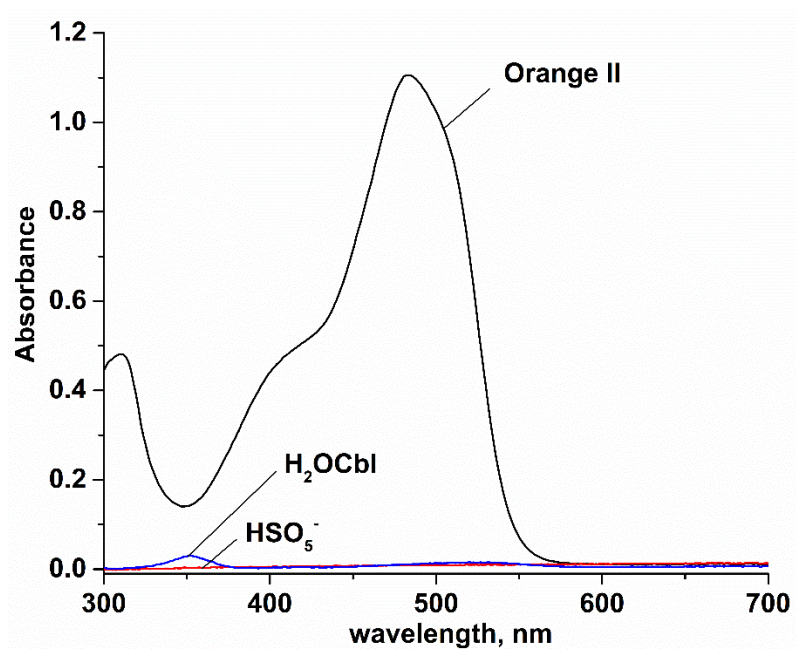

Figure S1. UV-vis spectra of Orange II ( $5.7 \cdot 10^{-5}$  M), H<sub>2</sub>OCbl ( $1.0 \cdot 10^{-6}$  M) and HSO<sub>5</sub><sup>-</sup> ( $5.0 \cdot 10^{-4}$  M) at pH 7.4, 25.0 °C

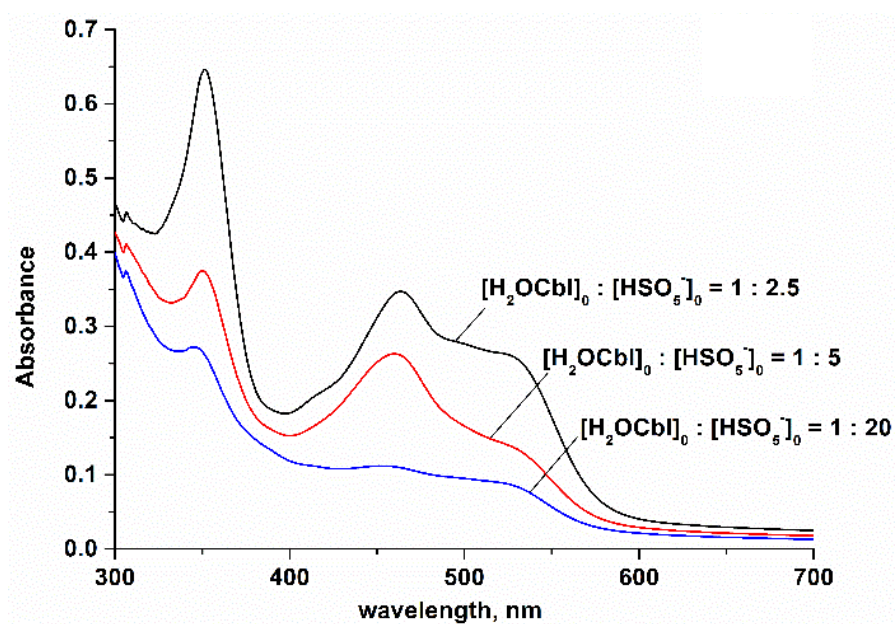

Figure S2. UV-vis spectra of the mixtures of H<sub>2</sub>OCbl ( $5.0 \cdot 10^{-5}$  M) with different quantities of HSO<sub>5</sub><sup>-</sup> recorded after 5 hours of incubation at pH 7.4, 25.0 °C

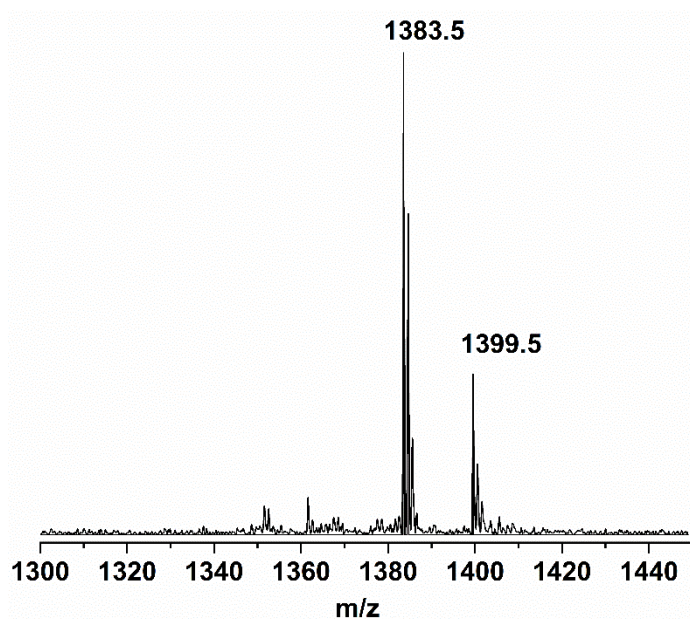

Figure S3. MALDI-mass-spectrum of the products of the reaction between  $\text{H}_2\text{OCbl}$  and two-fold excess of  $\text{HSO}_5^-$

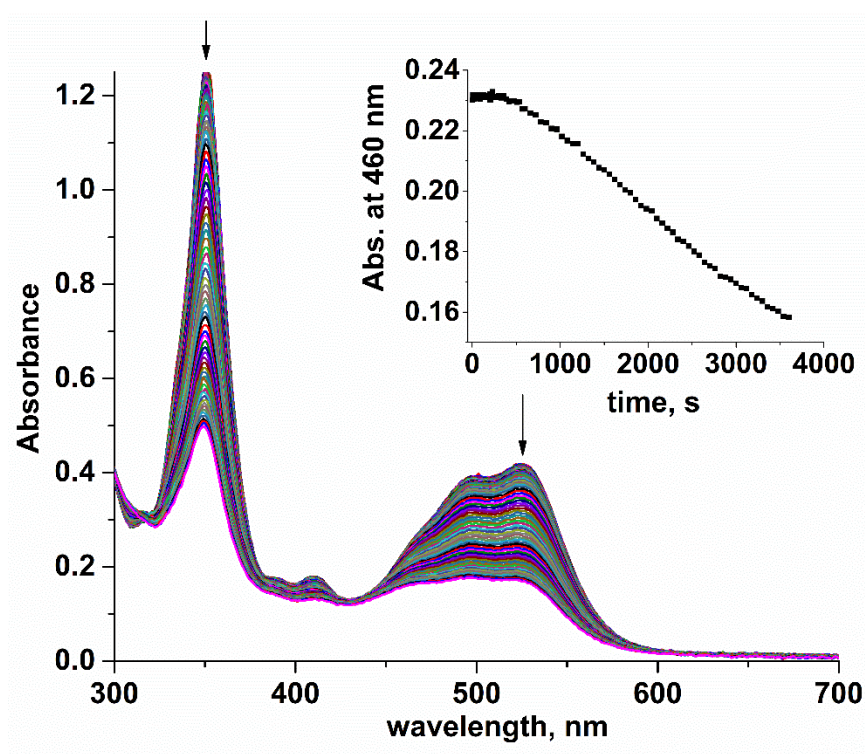

Figure S4. UV-vis spectra of the reaction between  $\text{H}_2\text{OCbl}$  ( $5.0 \cdot 10^{-5}$  M) and  $\text{HSO}_5^-$  ( $1.0 \cdot 10^{-3}$  M) at pH 4.5, 25.0 °C. Time intervals between spectra are 10, 30 and 60 s for 0...4, 4.5...10 and 10...60 min of the reaction, respectively. Inset: a time-course curve of the reaction

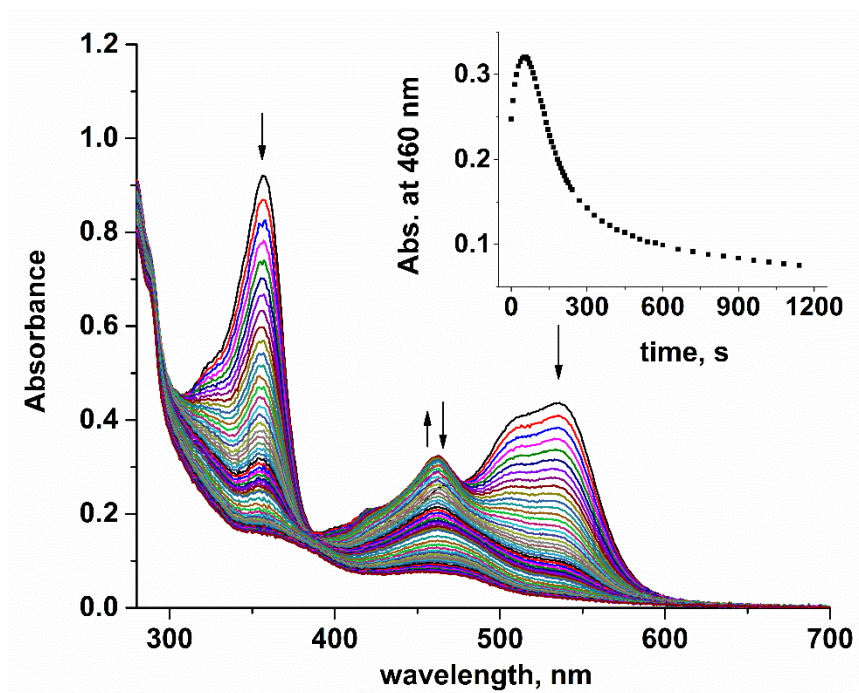

Figure S5. UV-vis spectra of the reaction between  $\text{H}_2\text{OCbl}$  ( $5.0 \cdot 10^{-5} \text{ M}$ ) and  $\text{HSO}_5^-$  ( $1.0 \cdot 10^{-3} \text{ M}$ ) at pH 9.2, 25.0 °C. Time intervals between spectra are 10, 30 and 60 s for 0...4, 4.5...10 and 10...19 min of the reaction, respectively. Inset: a time-course curve of the reaction

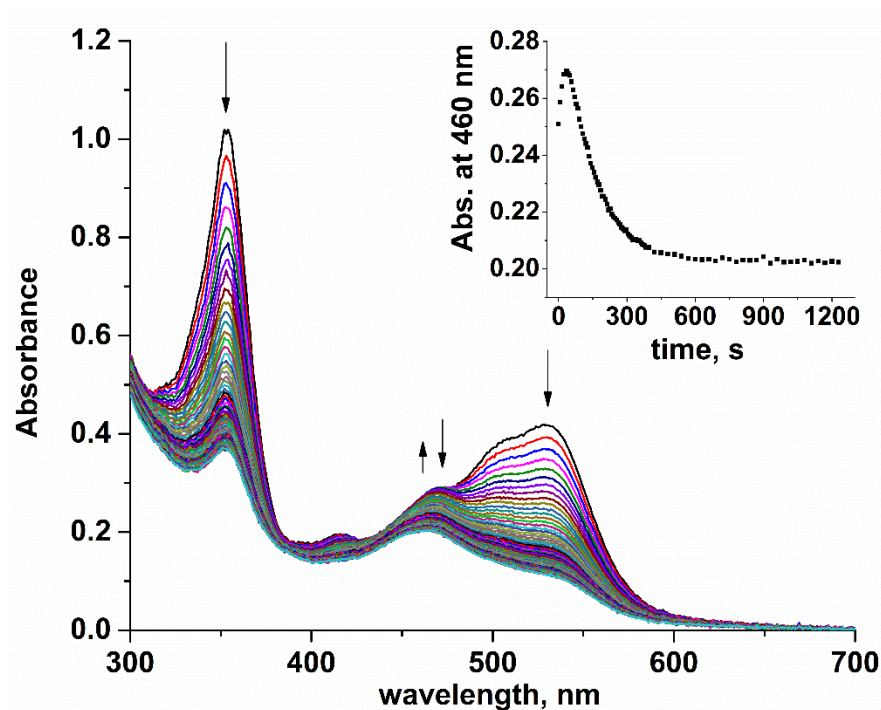

Figure S6. UV-vis spectra for the reaction between  $\text{H}_2\text{OCbl}$  ( $5.0 \cdot 10^{-5} \text{ M}$ ) with  $\text{HSO}_5^-$  ( $1.0 \cdot 10^{-3} \text{ M}$ ) at pH 7.4, 25.0 °C in the presence of ethanol ( $5.0 \cdot 10^{-2} \text{ M}$ ). Time intervals between spectra are 10 and 30 s for 0...6.5 and 7 ...21 min of the reaction, respectively. Inset: a time-course curve of the reaction



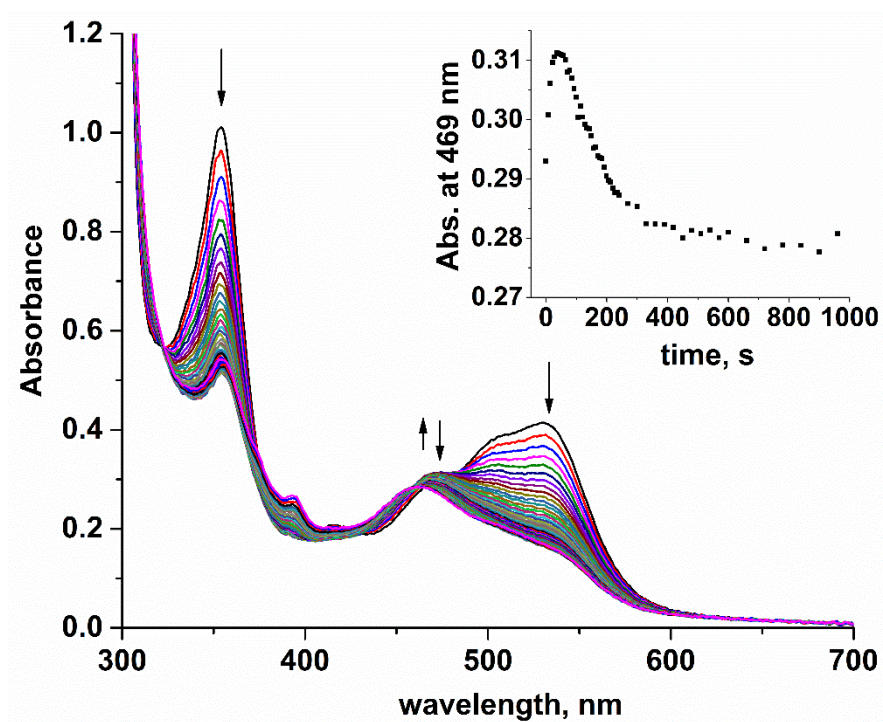

Figure S7. UV-vis spectra for the reaction between  $\text{H}_2\text{OCbl}$  ( $5.0 \cdot 10^{-5} \text{ M}$ ) with  $\text{HSO}_5^-$  ( $1.0 \cdot 10^{-3} \text{ M}$ ) at pH 7.4,  $25.0^\circ \text{C}$  in the presence of tryptophan ( $5.0 \cdot 10^{-3} \text{ M}$ ). Final spectra of the reaction are contributed by absorbance of tryptophan oxidation products. Time intervals between spectra are 10, 30 and 60 s for 0...4, 4.5...10 and 10...16 min of the reaction, respectively. Inset: a time-course curve of the reaction

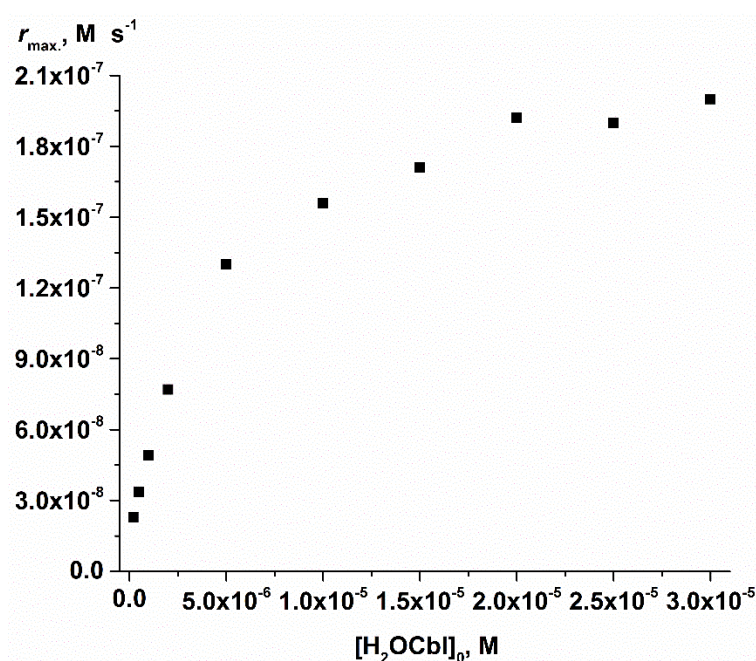

Figure S8. Plot of the maximum rate of the reaction between Orange II ( $5.7 \cdot 10^{-5} \text{ M}$ ) and  $\text{HSO}_5^-$  ( $5.0 \cdot 10^{-4} \text{ M}$ ) in the presence of  $\text{H}_2\text{OCbl}$  versus initial concentration of  $\text{H}_2\text{OCbl}$  at pH 7.4,  $25.0^\circ \text{C}$

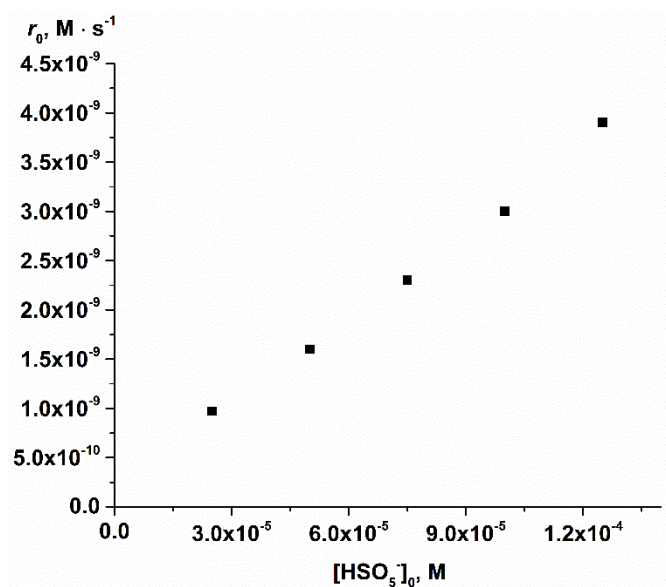

Figure S9. Plot of the initial rate of the reaction between Orange II ( $5.7 \cdot 10^{-5}$  M) and  $\text{HSO}_5^-$  in the presence of  $\text{H}_2\text{OCbl}$  ( $1.0 \cdot 10^{-6}$  M) versus initial concentration of  $\text{HSO}_5^-$  at pH 7.4, 25.0 °C

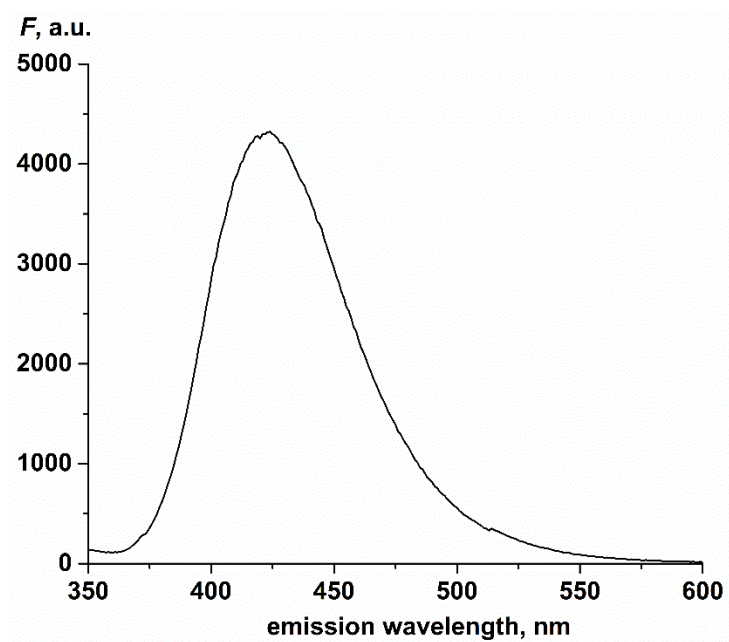

Figure S10. Fluorescence emission spectrum of 2-hydroxyterephthalic acid ( $1.0 \cdot 10^{-6}$  M) at pH 7.4, 25.0 °C

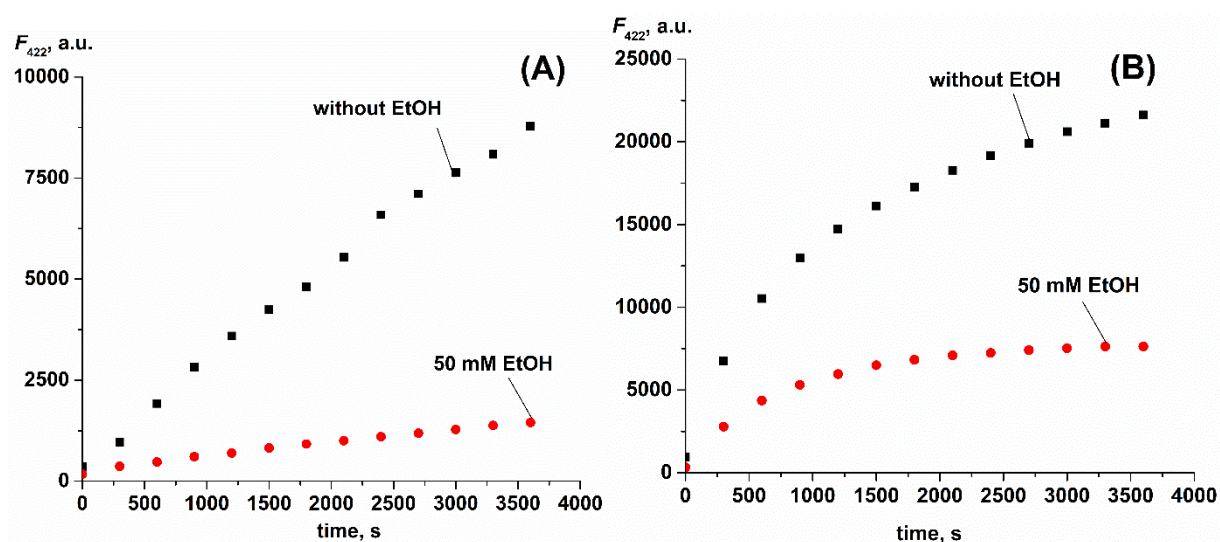

Figure S11. Plots of fluorescence intensity at 422 nm versus time for mixtures of terephthalic acid ( $1.0 \cdot 10^{-3}$  M) with  $\text{HSO}_5^-$  ( $5.0 \cdot 10^{-4}$  M; A) and with  $\text{HSO}_5^-$  ( $5.0 \cdot 10^{-4}$  M) and  $\text{H}_2\text{OCbl}$  ( $1.0 \cdot 10^{-6}$  M; B) in the absence and in the presence of ethanol (50 mM) at pH 7.4, 25.0 °C

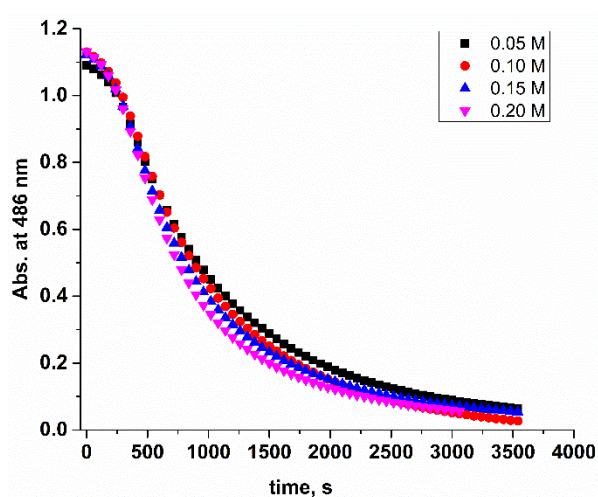

Figure S12. Time-course curves for the destruction of Orange II ( $5.5 \cdot 10^{-5}$  M) by the mixture of  $\text{H}_2\text{OCbl}$  ( $1.0 \cdot 10^{-6}$  M) with  $\text{HSO}_5^-$  ( $5.0 \cdot 10^{-4}$  M) at pH 7.4, 25.0 °C in the presence of different phosphate buffer concentrations



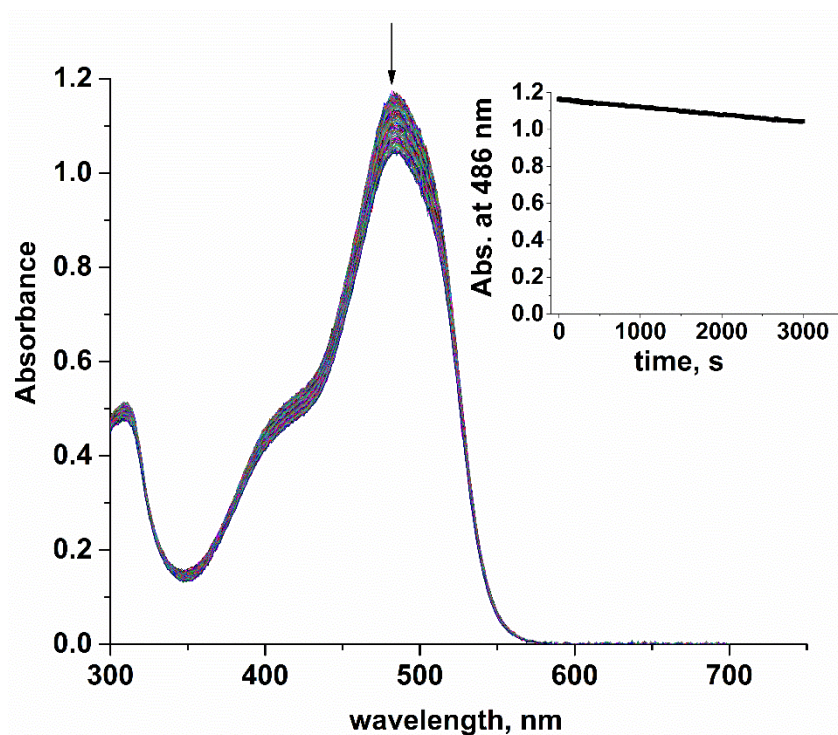

Figure S13. UV-vis spectra for the destruction of Orange II ( $5.7 \cdot 10^{-5}$  M) by the mixture of  $\text{H}_2\text{OCbl}$  ( $1.0 \cdot 10^{-6}$  M) with  $\text{HSO}_5^-$  ( $5.0 \cdot 10^{-4}$  M) at pH 7.4, 25.0 °C in the presence of  $\text{HCO}_3^-$  ( $5.0 \cdot 10^{-2}$  M). Time interval between spectra is 60 s. Inset: a time-course curve of the reaction

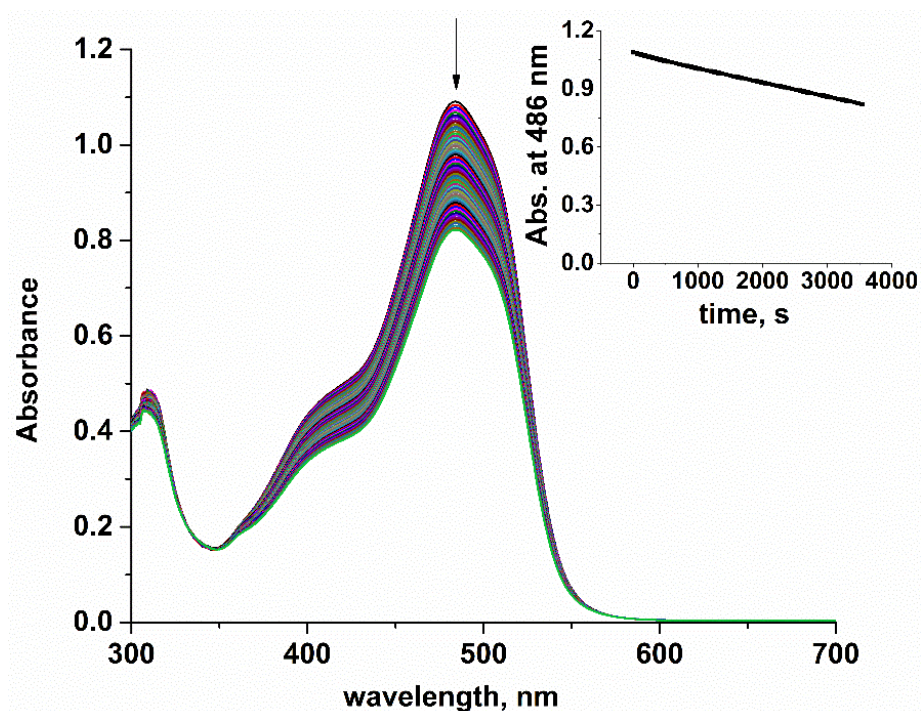

Figure S14. UV-vis spectra of the reaction between Orange II ( $5.5 \cdot 10^{-5}$  M) and  $\text{HSO}_5^-$  ( $5.0 \cdot 10^{-4}$  M) in the presence of  $\text{CNCbl}$  ( $1.0 \cdot 10^{-6}$  M) at pH 7.4, 25.0 °C. Time interval between spectra is 60 s. Inset: a time-course curve of the reaction



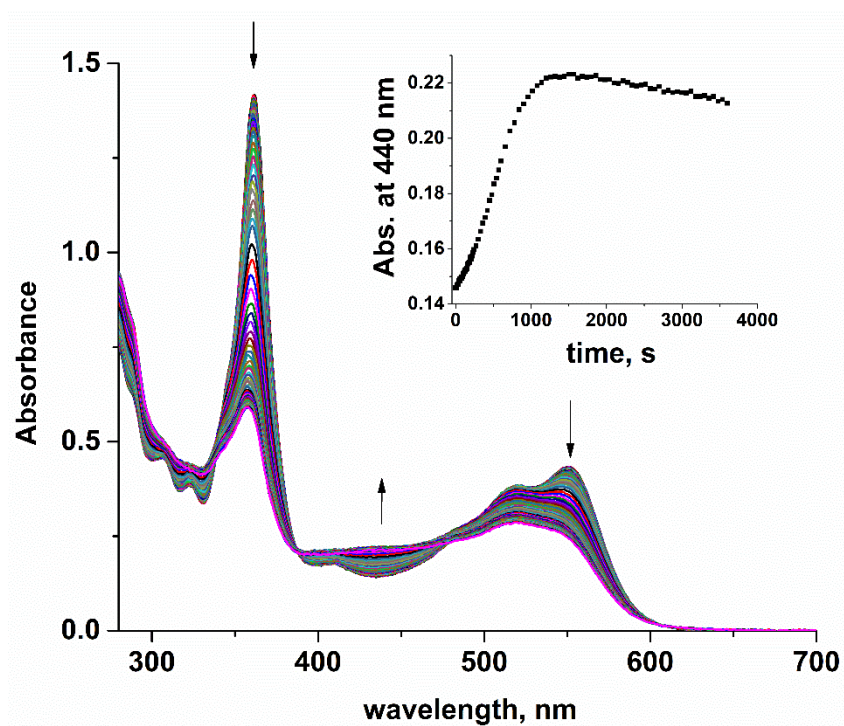

Figure S15. UV-vis spectra for the reaction between CNCbl ( $5.0 \cdot 10^{-5}$  M) with  $\text{HSO}_5^-$  ( $5.0 \cdot 10^{-4}$  M) at pH 7.0, 25.0 °C. Time interval between spectra is 60 s. Inset: a time-course curve of the reaction
